RESEARCH ARTICLE

# No evidence for morphometric associations of the amygdala and hippocampus with the five-factor model personality traits in relatively healthy young adults

Joshua C. Gray<sup>1\*</sup>, Max M. Owens<sup>2</sup>, Courtland S. Hyatt<sup>2</sup>, Joshua D. Miller<sup>2</sup>

**1** Department of Medical and Clinical Psychology, Uniformed Services University, Bethesda, MD, United States of America, **2** Department of Psychology, University of Georgia, Athens, Georgia, United States of America

\* [joshua.gray@usuhs.edu](mailto:joshua.gray@usuhs.edu)

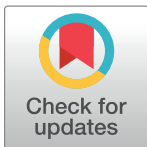

**OPEN ACCESS**

**Citation:** Gray JC, Owens MM, Hyatt CS, Miller JD (2018) No evidence for morphometric associations of the amygdala and hippocampus with the five-factor model personality traits in relatively healthy young adults. PLoS ONE 13(9): e0204011. <https://doi.org/10.1371/journal.pone.0204011>

**Editor:** Hengyi Rao, University of Pennsylvania, UNITED STATES

**Received:** January 3, 2018

**Accepted:** September 1, 2018

**Published:** September 20, 2018

**Copyright:** This is an open access article, free of all copyright, and may be freely reproduced, distributed, transmitted, modified, built upon, or otherwise used by anyone for any lawful purpose. The work is made available under the [Creative Commons CC0](https://creativecommons.org/licenses/by/4.0/) public domain dedication.

**Data Availability Statement:** These data are obtained from the Human Connectome Project and thus we must adhere to their data use terms (<https://www.humanconnectome.org/study/hcp-young-adult/data-use-terms>). They provide data access at the following link: <https://db.humanconnectome.org/>. Investigators seeking to replicate or extend these analyses should obtain the data directly from the Human Connectome Project. Investigators will need to create an account, which is a rapid process. In order to obtain restricted data, investigators will need to

## Abstract

Despite the important functional role of the amygdala and hippocampus in socioemotional functioning, there have been limited adequately powered studies testing how the structure of these regions relates to putatively relevant personality traits such as neuroticism. Additionally, recent advances in MRI analysis methods provide unprecedented accuracy in measuring these structures and enable segmentation into their substructures. Using the new FreeSurfer amygdala and hippocampus segmentation pipelines with the full Human Connectome Project sample (N = 1105), the current study investigated whether the morphometry of these structures is associated with the five-factor model (FFM) personality traits in a sample of relatively healthy young adults. Drawing from prior findings, the following hypotheses were tested: 1) amygdala and hippocampus gray matter volume would be associated with neuroticism, 2) CA2/3 and dentate gyrus would account for the relationship of the hippocampus with neuroticism, and 3) amygdala gray matter volume would be inversely associated with extraversion. Exploratory analyses were conducted investigating potential associations between all of the FFM traits and the structure of the hippocampus and amygdala and their subregions. Despite some previous positive findings of whole amygdala and hippocampus with personality traits and related psychopathology (e.g., depression), the current results indicated no relationships between any of the brain regions and the FFM personality traits. Given the large sample and utilization of sophisticated analytic methodology, the current study suggests no association of amygdala and hippocampus morphometry with major domains of personality.

## Introduction

Personality—“relatively enduring styles of thinking, feeling, and acting”[1]—is consistently associated with morbidity and mortality [2], well-being [3], occupational functioning [4], relational functioning [5], antisocial behavior and aggression [6], and forms of psychopathology (e.g.,

submit an application via the instructions detailed at the following link: <https://www.humanconnectome.org/study/hcp-young-adult/document/restricted-data-usage>. The only variable needed from the restricted dataset is the exact age of participants. However, near identical analyses may be conducted using the age ranges (e.g., 26–30, 31–35) available in the unrestricted data.

**Funding:** The authors received no specific funding for this work. These data were provided by the Human Connectome Project, WU-Minn Consortium (Principal Investigators: David Van Essen and Kamil Ugurbil; 1U54MH091657) funded by the 16 NIH Institutes and Centers that support the NIH Blueprint for Neuroscience Research; and by the McDonnell Center for Systems Neuroscience at Washington University in St. Louis. The authors are deeply appreciative to the Human Connectome Project for open access to its data.

**Competing interests:** The authors have declared that no competing interests exist.

[7,8]) including anxiety depression, addiction, and personality disorders. Personality is shaped by both genetic and environmental factors [9] and exhibits a relatively similar structure across cultures [1,10]. While several overlapping taxonomies exist that posit slightly fewer (e.g., [11,12]) or more dimensions (e.g., [13]), the big five/five-factor model (FFM) of personality [14] is arguably the most widely used taxonomy. This model posits five primary domains of personality—neuroticism, extraversion, openness, agreeableness, and conscientiousness—that are related meaningfully to a host of important outcomes [15].

Due to the broad public health relevance of the FFM (e.g., [16]), researchers have increasingly sought to understand the biological basis of these traits. For example, genetics research has yielded multiple genome-wide significant variants of FFM traits (for a review see [17]). Likewise, numerous functional magnetic resonance imaging (fMRI) studies have linked FFM traits to patterns of brain activity during relevant tasks and during rest (e.g., [18,19]). Finally, a number of studies have explored the structural neuroanatomy underlying the FFM.

Unfortunately, many of the neuroanatomical results have been inconsistent or conflicting, due to variation in methods (e.g., only focusing on certain FFM traits, type of MRI analyses used) and limited sample sizes. In an effort to resolve many of these discrepancies, Riccelli et al. (2017) recently used data from the Human Connectome Project (N = 507) to conduct the largest and most comprehensive study of the cortical correlates of the FFM to date [20]. Among the findings most convergent with the second largest study by Bjørnebekk et al. (2013) (N = 265) [21] was the association of neuroticism with smaller area in prefrontal-temporal regions. However, key differences have been found as well; for instance, the former study found extraversion was associated with posterior regions like the precuneus, superior temporal gyrus, entorhinal cortex, and fusiform gyrus [20], whereas the latter found only an association with thinner inferior frontal gyrus [21]. In general, Riccelli et al. (2017) found numerous associations across all FFM traits that had not been previously reported. Indeed, just as in genetics research [17], increasing sample sizes enables the accurate assessment of smaller effect sizes in morphometric research.

In addition to cortical correlates of the FFM, the amygdala and hippocampus have been studied in relation to extraversion, neuroticism, and conscientiousness, due to their role in emotional and social processing [22–27]. Despite theoretical justification and fMRI studies suggesting important relationships between FFM traits and these regions (e.g., [18,19]), the relationships in morphometric studies are inconsistent to date (Table 1). With regard to extraversion, one early study found a positive association between extraversion and left amygdala gray matter density (but not volume) [28], another found a positive association with right amygdala volume [29], but a third study found a negative association with bilateral amygdala volume [30], and four others found no relationship [31–34]. With regard to neuroticism, a meta-analysis found negative emotionality (including studies of neuroticism) was associated with a larger left amygdala and a qualitative review found no clear pattern of association with the hippocampus [35]. Additionally, the largest single study of neuroticism and morphometry of the amygdala (N = 1050) found that neuroticism was associated with increased bilateral amygdala volume [36]. Only one study has explored the association of the hippocampus with extraversion and conscientiousness, and no direct associations were identified [34]. In sum, the research indicates the amygdala has no clear relationship with extraversion and appears to be positively associated with neuroticism. The limited number of studies of the hippocampus in relation to the FFM traits, neuroticism and extraversion in particular, is surprising considering its role in emotional responses, connectivity with the amygdala [37], and association with multiple of psychiatric disorders [38–40].

Additional insights into the amygdala and hippocampus in relation to neuroticism may be gleaned from well-powered meta-analyses of closely associated disorders, major depression and anxiety [7]. Co-morbid major depression and anxiety disorders have been associated with

**Table 1. Previous studies that assessed amygdalar and hippocampal volume associations with FFM.**

| Study                | Software   | Region                   | Participants <sup>1</sup> | Age  | Extraversion                    | Neuroticism                       | Conscientiousness |
|----------------------|------------|--------------------------|---------------------------|------|---------------------------------|-----------------------------------|-------------------|
| Omura et al., 2005   | SPM        | Amygdala                 | 41                        | 23.8 | Null                            | Null                              | —                 |
| Wright et al., 2006  | FreeSurfer | Amygdala                 | 28                        | 24.0 | Null                            | Null                              | —                 |
| Wright et al., 2007  | FreeSurfer | Amygdala                 | 29                        | 70.3 | Null                            | Null                              | —                 |
| Cremers et al., 2011 | SPM        | Amygdala                 | 65                        | 40.5 | Increased R amygdala volume     | Null                              | —                 |
| Jackson et al., 2011 | FreeSurfer | Amygdala and hippocampus | 79                        | 66.0 | Null                            | Null                              | Null              |
| Holmes et al., 2012  | FreeSurfer | Amygdala                 | 1050                      | 21.4 | —                               | Increased L and R amygdala volume | —                 |
| Koelsch et al., 2013 | SPM        | Amygdala                 | 59                        | 24.2 | Null                            | Increased L amygdala volume       | —                 |
| Lu et al., 2014      | SPM        | Amygdala                 | 71                        | 22.4 | Reduced L and R amygdala volume | —                                 | —                 |

Note.

<sup>1</sup>All studies used healthy adults; — = trait was not studied; also see meta-analysis of negative emotionality (Mincic, 2015).

<https://doi.org/10.1371/journal.pone.0204011.t001>

a smaller right amygdala [41], and the most recent meta-analysis of major depressive disorder found it was associated with smaller left hippocampus [40]. Furthermore, a meta-analysis of the morphometry of all common psychiatric disorders found consistent gray matter loss in a number of regions including amygdala and hippocampus [42]. They found this effect was primarily driven by major depressive disorder. Despite these findings, the extent to which decreased hippocampal and amygdalar volume is a cause or consequence of depression or anxiety remains uncertain [40,41,43]. In sum, while not present in every meta-analysis, smaller hippocampus and sometimes amygdala is present in individuals with depression, especially with co-occurring anxiety. This is in peculiar contrast to the finding of a larger left amygdala in relation to negative emotionality, given the established links between neuroticism and internalizing psychopathology [7,35]. Despite this promising work, no large well-powered studies have explored the hippocampus and amygdala in relation to the FFM, with the exception of a single study focusing on the amygdala and neuroticism [36]. As such, lack of statistical power renders most of these findings difficult to interpret, and it is uncertain the extent to which these findings will replicate in adequately powered tests.

There are many possible explanations for the inconsistent findings in the hippocampus and amygdala literature. In particular, relatively small sample sizes of individual studies, namely those of extraversion, may limit the replicability of findings with regard to the amygdala. Additionally, recent advances in software such as FreeSurfer [44] now enable much more reliable whole hippocampal and amygdalar estimation [45,46], and also provide subdivisions of both regions, allowing for a higher resolution. In particular, the dentate gyrus and CA2/3 of the hippocampus have been specifically linked to early life adversity and stress [47–49], two environmental factors that have also been shown to increase neuroticism and decrease conscientiousness and agreeableness over time [50]. However, the research on these subfields in relation to major depressive disorder, a close correlate of neuroticism, has been inconsistent (e.g., [51,52]). Although the amygdalar nuclei are not well-studied in humans, the nuclei, namely the central amygdala, have been well-researched in animal models. This research has found the central amygdala is essential to response to fearful stimuli, stressful stimuli, and

drug-related stimuli [53]. Therefore, examining the nuclei of the amygdala in relation to personality may help clarify specific functions in humans.

## Current study

The current investigation leverages recent advances in hippocampal and amygdalar segmentation software [45,46] and the full Human Connectome Project data ( $N \sim 1200$ ; <https://db.humanconnectome.org/>). Specifically, the study assessed the relationship between the whole hippocampus and amygdala and their subdivisions with the FFM using the largest sample to date. Based on prior work, our hypotheses were that reduced gray matter volume (GMV) of the hippocampus would be associated with neuroticism and GMV of the amygdala would be associated with neuroticism, but in uncertain direction given the conflicting findings across negative emotionality and depression/anxiety research [35,36,41,42]. Furthermore, we hypothesized that the CA2/3 and dentate gyrus would account for the relationship of the whole hippocampus with neuroticism. We also hypothesized that reduced GMV of the bilateral amygdala would be associated with extraversion. Finally, we explored all possible associations of the FFM traits with the subdivisions of the hippocampus and amygdala.

## Materials and methods

### Participants

Data were drawn from the publicly available repository of the WU-Minn HCP (<http://www.humanconnectome.org/>). Structural MRI data were collected from 1,113 participants at Washington University as part of the Human Connectome Project. Informed consent was obtained for all participants (consent procedure and full inclusion/exclusion criteria are detailed in [54,55]). Participants were 22–37 years old and had no significant history of psychiatric disorder, substance abuse, neurological disorder or damage, cardiovascular disease, or Mendelian genetic disease (e.g., cystic fibrosis). The FFM was assessed with the NEO-FFI, a 60-item self-report measure that uses 12 items to assess each FFM domain [14]. 8 participants did not complete the NEO-FFI and thus the final sample comprised 1105 participants (Table 2).

### MRI data acquisition and pre-processing

Structural images were collected on a 3T Siemens Skyra scanner (Siemens AG, Erlanger, Germany) with a 32-channel head coil. T1-weighted structural images were acquired with a resolution of  $0.7 \text{ mm}^3$  isotropic (FOV =  $224 \times 240$ , matrix =  $320 \times 320$ , 256 sagittal slices; TR = 2400 ms and TE = 2.14 ms). All structural images were reviewed by a technician immediately following acquisition to ensure scans did not have any significant problems (i.e., artifacts, substantial movement). If problems were found, structural scans were reacquired immediately. Within hours of the initial acquisition, scans were examined by quality control specialists who assessed them for image crispness, blurriness, motion and other artifacts, and accuracy of defacing. Based on these factors, scans were rated on a 1 to 4 scale (poor to excellent). In all cases where structural scans were below 3 (good), new structural scans were reacquired on the participant's second study day. Through this process, all subjects had high-quality structural imaging data.

Data were reconstructed and preprocessed using Chris Rorden's DICOM to NIFTI conversion software [56] and a modified version of the FreeSurfer automated "recon-all" pipeline [57–59] in FreeSurfer Image Analysis Suite version 5.3 (<http://surfer.nmr.mgh.harvard.edu>) [44]. That pre-processing pipeline includes correction of distortions in the raw MR images resulting from several sources, skull-stripping, labeling of tissue types in the brain (i.e., gray

**Table 2. Demographic characteristics (N = 1105).**

|                                                            | M (SD) or %  |
|------------------------------------------------------------|--------------|
| Sex                                                        |              |
| Male                                                       | 45.7%        |
| Female                                                     | 54.3%        |
| Age                                                        | 28.8 (3.7)   |
| Race                                                       |              |
| White or Caucasian                                         | 74.8%        |
| Black or African American                                  | 15.1%        |
| Asian American, Native Hawaiian, or other Pacific Islander | 5.7%         |
| Native American                                            | .2%          |
| More than one race                                         | 2.5%         |
| Not sure or unknown                                        | 1.7%         |
| Ethnicity                                                  |              |
| Hispanic or Latino                                         | 8.5%         |
| Not Hispanic or Latino                                     | 90.3%        |
| Not sure or unknown                                        | 1.2%         |
| Income                                                     |              |
| \$1,000-\$9,999/year                                       | 7.1%         |
| \$10,000-\$19,999/year                                     | 7.9%         |
| \$20,000-\$29,999/year                                     | 12.5%        |
| \$30,000-\$39,999/year                                     | 12.0%        |
| \$40,000-\$49,999/year                                     | 10.3%        |
| \$50,000-\$74,999/year                                     | 21.1%        |
| \$75,000-\$99,999/year                                     | 13.5%        |
| \$100,000-\$149,999/year                                   | 15.6%        |
| Years of Education                                         | 14.92 (1.80) |

<https://doi.org/10.1371/journal.pone.0204011.t002>

matter, white matter, cerebrospinal fluid), identification of sulci and gyri, tessellation of the surface of the brain, and warping of images into a common space [57]. The output of this pipeline is GMV for each region, as well as several summary statistics including total intracranial volume (ICV) which was utilized as a covariate in this study.

### Hippocampus and amygdala segmentation

Hippocampal subfield segmentation was derived using the automated algorithm available in FreeSurfer version 6.0 [45]. This method uses a new atlas of the hippocampus and its nuclei built on a combination of manual annotations of the hippocampal subregions from 15 ultra-high resolution, ex vivo images and data from an independent set of 39 in vivo, T1-weighted, 1-mm resolution MRI scans. A validation study of this method found the new segmentation procedure to have a high degree of test-retest and transplatform reliability across scanning modalities (1.5-T vs 3-T scanners) [60]. Likewise, amygdala nuclei segmentation was completed utilizing the new automated algorithm available in FreeSurfer version 6.0 [46]. This methodology also utilizes a new atlas of amygdala segments generated from postmortem scans conducted at high resolution and 7T field strength. A recent validation study indicates this new atlas is an improvement over past whole amygdala estimations and effectively discriminates between Alzheimer’s disease and age-matched controls [46]. In the current study, the CA4 and granule cell layer were combined because they are both components of the dentate gyrus and the molecular layer was excluded because it is not easily distinguished in T1-weighted images [45].

The segmentation procedure for the hippocampus and amygdala enables the visualization and quantification of hippocampus amygdala nuclei, which are the subject of the current investigation. These procedures use the newly constructed atlases of the hippocampus and amygdala (described above) to automatically segment the hippocampus and amygdala nuclei from the MRI data of each individual subject. Hippocampus and amygdala segmentation analyses are conducted as an iterative optimization problem in a Bayesian inference framework that attempts to identify the segment to which each voxel is most likely to belong based its recorded intensity and location in the constructed atlases described above [45,46]. The outputs of these analyses are GMV (in mm<sup>3</sup>) for each nuclei of the hippocampus and amygdala (separately for left and right side), as well as for the whole hippocampus and amygdala. Thus, these automated segmentation procedures use Bayesian inference to apply the newly created and validated atlases of the hippocampus and amygdala to the data of novel, *in vivo* subjects in order to determine these individuals' GMV in the segments described in these atlases.

### Statistical analyses

For preliminary analyses we conducted independent samples t-tests and analyses of covariance (ANCOVAs; controlling for age and ICV) to test for gender differences in FFM traits and amygdala/hippocampal volumes, respectively. To control for type I error rate in primary analyses, we utilized a hierarchical analytical approach based on the level of prior empirical support for the regions with at least one FFM trait. In all cases, we conducted linear regressions with the brain region as the dependent variable and FFM traits as the independent variables. Age, gender, and ICV were also included in all analyses as covariates. At the first stage of FWE correction, we conducted four regressions of the FFM and left and right amygdala and hippocampus. In the second stage, we conducted four regressions of the FFM with the previously supported subdivisions of the hippocampus: the left and right CA2/3 and dentate gyrus (i.e., CA4/GC; CA4 and GC were combined because they are both components of the dentate gyrus and because the ability to distinguish the molecular layer in T1-weighted images is limited<sup>35</sup>). In the third stage, we conducted simultaneous regressions of the FFM and the remaining nuclei and segmentations that have not been explored as thoroughly in humans to date: 1) 18 nuclei of the amygdala (9 on each side); and 2) 14 segmentations of the hippocampus (7 on each side). The false discovery rate (FDR; [61]) was set at  $q < .05$ , and each level of analysis included the  $p$ -values from the prior levels (i.e., stage 1 = FDR correction for 4 tests; stage 2 = FDR correction for 8 tests; stage 3 = FDR correction for all 40 tests).

To ensure effects were not missed by eliminating shared variance in regressions including all FFM traits simultaneously (e.g., [62,63]), we conducted separate linear regressions for each of the FFM traits and the left and right amygdala, hippocampus, CA2/3, and dentate gyrus. We also report regressions for the remaining exploratory regions.

To ensure we did not miss gender-specific effects, as has been found in cortical FFM analyses (see [64]), we conducted linear regressions which included covariates, one FFM trait, gender, and a FFM trait by gender interaction term. Finally, we conducted nonlinear regressions with quadratic terms such that each regression included: both linear and quadratic terms for one FFM trait, gender, age, and ICV. These gender interaction and nonlinear regressions were only run for the 4 a priori regions on each side. Both nominal and FDR corrected significance were reported in all analyses.

## Results

### Preliminary analyses

A correlation matrix of the FFM (including internal reliabilities) can be found in Table 3. The FFM were generally correlated as expected [65] and exhibited acceptable to good internal

**Table 3. Means and Pearson correlations among FFM traits.**

| Variable                                | M(SD)     | 1     | 2     | 3     | 4     |
|-----------------------------------------|-----------|-------|-------|-------|-------|
| 1. Agreeableness ( $\alpha = .76$ )     | 33.5(5.8) | ---   | ---   | ---   | ---   |
| 2. Openness ( $\alpha = .75$ )          | 28.3(6.2) | .09*  | ---   | ---   | ---   |
| 3. Conscientiousness ( $\alpha = .82$ ) | 34.5(5.9) | .23*  | -.13* | ---   | ---   |
| 4. Neuroticism ( $\alpha = .84$ )       | 16.6(7.4) | -.29* | .01   | -.40* | ---   |
| 5. Extraversion ( $\alpha = .77$ )      | 30.7(6.0) | .28*  | .10*  | .26*  | -.35* |

Note.

\* =  $p < .005$

<https://doi.org/10.1371/journal.pone.0204011.t003>

reliability ( $\alpha = .75$ – $.84$ ). Generally consistent with prior research of sex differences in personality in the United States [66], women exhibited significantly lower levels of openness; higher levels of agreeableness, conscientiousness, and neuroticism ( $ps < .005$ ); and no differences on extraversion (means and standard deviations in S1 Table). With regard to brain regions, after controlling for age and ICV, women had significantly smaller left and right amygdala and larger left hippocampus (along with several corresponding subfields; S2 Table). Differences in amygdala volume are consistent with the literature [67] whereas differences in hippocampal volume are inconsistent [67,68] and are quite small in this study.

### Whole amygdala and hippocampus

In the linear regressions containing covariates (i.e., age, gender, and ICV) and the FFM, no nominally significant relationships were found with left or right whole amygdala and hippocampus (Table 4). The strongest but non-significant relationship was found between the right amygdala and extraversion ( $\beta = .04, p = .08$ ). However, even when allowing for shared variance among the traits by conducting linear regressions separately for each FFM trait, there were no significant associations between the FFM and these 4 regions ( $ps > .05$ ; S3 Table). Additionally, there were no significant gender by FFM interactions.

In the quadratic regressions, the squared agreeableness term was associated with left and right whole hippocampus ( $\beta = .50, p = .03$ ;  $\beta = .65, p = .01$ ), indicating that a convex relationship exists, such that high and low values of agreeableness are associated with a larger hippocampus. These results were not FDR significant (accounting for 40 tests [8 regions and 5 traits]).

**Table 4. Univariate linear regressions of the whole amygdala, whole hippocampus, CA2/3, and dentate gyrus with the FFM and age, gender, and ICV included as covariates.** For each variable  $\beta(p)$ .

|                 | Agreeableness | Openness | Conscientiousness | Neuroticism | Extraversion |
|-----------------|---------------|----------|-------------------|-------------|--------------|
| L amygdala      | .01(.68)      | .00(.85) | -.02(.34)         | .02(.57)    | .03(.25)     |
| R amygdala      | .04(.13)      | .00(.88) | -.02(.38)         | .03(.22)    | .04(.08)     |
| L hippocampus   | -.02(.62)     | .01(.69) | .00(.96)          | -.01(.88)   | .04(.22)     |
| R hippocampus   | -.02(.65)     | .01(.78) | .01(.84)          | -.02(.53)   | .04(.21)     |
| L CA2/3         | -.01(.76)     | .03(.38) | -.01(.72)         | .00(.90)    | .02(.49)     |
| R CA2/3         | -.01(.73)     | .00(.89) | -.03(.36)         | -.04(.26)   | .04(.24)     |
| L dentate gyrus | -.02(.50)     | .01(.79) | .00(.94)          | .02(.60)    | .03(.43)     |
| R dentate gyrus | .00(.95)      | .00(.96) | -.01(.69)         | -.02(.50)   | .03(.31)     |

Note. ICV = intracranial volume.

<https://doi.org/10.1371/journal.pone.0204011.t004>

### CA2/3 and dentate gyrus

In the 4 linear regressions of FFM predicting the left and right CA2/3 and dentate gyrus, no nominally significant relationships were found ( $p > .05$ ; Table 4). Similarly, no additional associations were identified in the linear regressions conducted separately for each FFM trait ( $p > .05$ ; S2 Table). There was one nominally significant interaction of gender and agreeableness predicting left CA2/3 ( $\beta = .20, p = .048$ ), but this was not FDR significant. Probing the interaction revealed opposite direction of effects by gender, neither of which was nominally significant.

In the quadratic regressions, the squared agreeableness term was associated with left and right dentate gyrus ( $\beta = .48, p = .04, \beta = .67, p = .004$ ), indicating that a convex relationship exists, such that high and low values of agreeableness are associated with a larger dentate gyrus. These results were not FDR significant (accounting for 40 tests [8 regions and 5 traits]).

### Exploratory analysis of segmentations of amygdala and hippocampus

With regard to the amygdala, there were several nominal associations with FFM traits ( $p < .05$ ), however, none of these survive FDR correction (see Table 5). Of note, the trend level positive association between right whole amygdala and extraversion noted above appears to be attributable to associations with right accessory basal nucleus ( $\beta = .05; p = .04$ ), anterior amygdaloid area ( $\beta = .06; p = .04$ ), and central nucleus ( $\beta = .07; p = .02$ ). None of the 7 remaining segmentations on the left or right side of the hippocampus were nominally significantly associated with the FFM. There were no additional associations identified in the linear regressions conducted separately for each FFM trait (S3 Table).

### Discussion

This study explored the amygdalar and hippocampal correlates of the FFM. Based on previous research, we hypothesized: 1) reduced GMV of the hippocampus would be associated with neuroticism and GMV of the amygdala would be associated with neuroticism, but with no hypothesized direction; 2) CA2/3 and dentate gyrus would account for the relationship of the hippocampus with neuroticism, and 3) reduced GMV of the amygdala would be associated with extraversion. In contrast to prior findings, we did not find any significant relationships among these regions, and this was consistent between univariate and multivariate models of personality predicting amygdalar or hippocampal GMV. Our exploratory analyses of the FFM traits and the subdivisions of the hippocampus and amygdala also suggested no significant relationships.

These three sets of hypotheses were grounded in prior work on the FFM traits and psychopathology closely associated with neuroticism (i.e., major depressive disorder and generalized anxiety disorder). Specifically, well-powered work on depression and anxiety generally found smaller hippocampus and sometimes amygdala [40–42], whereas a previous activation likelihood estimation (ALE) meta-analysis of negative emotionality found an association with larger amygdala [35]. With regard to the specific studies on the NEO-FFI measured neuroticism, one identified larger bilateral amygdala [36], one identified a larger volume in the left amygdala [31], but five found no association [28,29,32–34] (Table 1). The largest single study ( $N = 1050$ ) used similar covariates (age, sex, ICV; they also included IQ) and population (i.e., healthy young adults) to the present investigation, but did find a positive association between bilateral amygdala GMV and neuroticism. It may be that the failure to replicate is attributable to improvements made to amygdala segmentation since their investigation [46]. Additionally, if a true relationship existed between neuroticism and amygdalar GMV, it would be expected that a closer look at subnuclei of the amygdala would yield a relationship, but none was found here. With regard to the hippocampus and neuroticism, only one study was completed to date and



**Table 5. Univariate linear regressions of the remaining nuclei of the amygdala and segmentations of the hippocampus with the FFM and age, gender, and ICV included as covariates.** For each variable  $\beta(p)$ .

|                       | Agreeableness   | Openness  | Conscientiousness | Neuroticism     | Extraversion    |
|-----------------------|-----------------|-----------|-------------------|-----------------|-----------------|
| <b>Amygdala</b>       |                 |           |                   |                 |                 |
| L lateral nucleus     | .02(.43)        | -.01(.60) | -.02(.37)         | .03(.27)        | .03(.20)        |
| R lateral nucleus     | .03(.33)        | -.01(.60) | -.03(.23)         | .02(.57)        | .04(.16)        |
| L basal nucleus       | .03(.29)        | .00(.93)  | -.03(.18)         | .01(.65)        | .02(.45)        |
| R basal nucleus       | <b>.06(.02)</b> | .01(.62)  | -.03(.23)         | .04(.13)        | .03(.22)        |
| L Ac basal nucleus    | -.01(.60)       | .01(.79)  | -.02(.47)         | -.01(.84)       | .02(.37)        |
| R Ac basal nucleus    | .03(.30)        | .00(.96)  | -.01(.83)         | .03(.32)        | <b>.05(.04)</b> |
| L An amygdaloid area  | .00(.92)        | -.01(.80) | -.02(.50)         | .02(.58)        | .03(.24)        |
| R An amygdaloid area  | .04(.15)        | -.01(.58) | -.01(.73)         | .04(.20)        | <b>.06(.04)</b> |
| L central nucleus     | -.01(.78)       | -.01(.59) | .02(.60)          | .05(.14)        | .05(.11)        |
| R central nucleus     | .01(.83)        | -.02(.40) | .02(.61)          | .05(.13)        | <b>.07(.02)</b> |
| L medial nucleus      | -.04(.27)       | .01(.76)  | -.00(.89)         | -.04(.24)       | .02(.53)        |
| R medial nucleus      | -.05(.09)       | .01(.75)  | .04(.18)          | -.02(.47)       | .04(.26)        |
| L cortical nucleus    | -.04(.17)       | .03(.28)  | .01(.66)          | -.02(.52)       | .01(.68)        |
| R cortical nucleus    | -.02(.46)       | .01(.80)  | .03(.33)          | .00(.98)        | .04(.24)        |
| L corticoamygdaloid T | -.01(.63)       | -.01(.64) | -.01(.68)         | .00(.91)        | .02(.42)        |
| R corticoamygdaloid T | .05(.10)        | -.01(.75) | -.01(.77)         | <b>.06(.04)</b> | .04(.17)        |
| L paralaminar nucleus | <b>.06(.03)</b> | .01(.82)  | -.03(.21)         | .00(.95)        | -.01(.76)       |
| R paralaminar nucleus | <b>.06(.02)</b> | .02(.45)  | -.05(.07)         | .02(.55)        | .00(.99)        |
| <b>Hippocampus</b>    |                 |           |                   |                 |                 |
| L subiculum           | .00(.93)        | .02(.61)  | .02(.61)          | -.02(.54)       | .05(.17)        |
| R subiculum           | -.03(.44)       | .02(.64)  | .02(.67)          | -.01(.69)       | .05(.18)        |
| L presubiculum        | .00(.99)        | .01(.64)  | -.02(.65)         | .01(.83)        | .04(.20)        |
| R presubiculum        | -.02(.52)       | .01(.83)  | .03(.41)          | .02(.67)        | .02(.53)        |
| L parasubiculum       | .02(.52)        | .01(.69)  | -.01(.84)         | .04(.24)        | .05(.11)        |
| R parasubiculum       | .00(.96)        | .00(.93)  | .04(.29)          | .02(.53)        | -.01(.87)       |
| L CA1                 | .00(.97)        | .01(.66)  | .01(.83)          | .03(.46)        | .03(.31)        |
| R CA1                 | -.01(.72)       | .02(.48)  | .01(.72)          | -.01(.84)       | .04(.29)        |
| L fimbria             | .02(.57)        | -.02(.62) | .01(.77)          | -.05(.15)       | -.04(.24)       |
| R fimbria             | -.01(.88)       | .00(.99)  | .04(.29)          | -.02(.62)       | -.06(.08)       |
| L HATA                | -.03(.44)       | .02(.56)  | .03(.43)          | -.02(.65)       | .02(.47)        |
| R HATA                | -.02(.51)       | -.01(.76) | .03(.40)          | .00(.97)        | .04(.25)        |
| L hippocampal fissure | .07(.05)        | .03(.39)  | -.02(.48)         | .02(.66)        | -.01(.71)       |
| R hippocampal fissure | .00(.98)        | .05(.15)  | .04(.24)          | .02(.62)        | .03(.42)        |

Note. ICV = intracranial volume, Ac = accessory, An = anterior, T = transition, HATA = hippocampal-amygdaloid transition area. Bolding indicates nominal significance ( $p < .05$ ).

<https://doi.org/10.1371/journal.pone.0204011.t005>

it found no association [34]. Research was similarly inconsistent with regard to extraversion and the amygdala, with two studies finding associations in opposite directions [29,30], and five not finding any [28,31–34]. The current investigation did not replicate any positive findings despite using the largest sample to date, the most accurate hippocampal and amygdalar segmentation methods to date [45,46], and assessing subregions, gender interactive effects, and nonlinear effects.

With regard to the exploratory analyses, given the role of both the traits and the hippocampus and amygdala in socioemotional functioning [22,23,37], we anticipated some significant

associations among the whole structures or their substructures. While we did find nominally significant associations among some select traits and amygdalar subnuclei, none of these survived false discovery rate correction. Given sex differences in the FFM and in the biology of depression [69,70], we explored gender-specific findings, but identified no differences in effects sizes across any of the traits and a priori regions. There were some nominal associations of nonlinear relationships between agreeableness and hippocampus and dentate gyrus that will need to be followed up on in future research. Given the null findings of the whole hippocampus and amygdala and their subregions with FFM traits, there is little evidence of an association in a relatively healthy young sample of the largest size to date.

This study was not without its limitations. The study was comprised of a relatively healthy population [55], broadly defined, and therefore it is limited in its ability to generalize to more severe clinical samples. However, the sample includes notable levels of anxiety and depressive symptoms [71], and Riccelli et al. (2017) identified numerous cortical associations in the same sample, but half the size. Furthermore, healthy samples were used in the prior studies of neuroticism, extraversion, and conscientiousness with the amygdala and hippocampus. Nonetheless, it will be important for future investigations to include more severe clinical samples to assess for consistency of findings. A second limitation to generalizability is this sample was a relatively tight age range (years 22–37) and therefore generalization to youth and older adults is uncertain, particularly given the relationship of aging with hippocampal size [72].

In the largest study of the FFM and structural morphometry to date, using the highest resolution segmentation methodology available, no associations between FFM traits and amygdalar and hippocampal volumes were found. These null findings are consistent with a recent methodological paper that found small studies are at a high risk for overestimating the effect sizes of brain-behavior correlations [73,74]. Nonetheless, these regions appear to be functionally implicated in personality and future investigations should continue to parse these relationships in unique samples and via diffusion tensor imaging and relevant fMRI tasks (e.g., [75–77]).

## Supporting information

**S1 Table. Independent samples t-tests of FFM separated by gender.**  
(DOCX)

**S2 Table. Mean (SD) gray matter volume of amygdala and hippocampus subregions in mm<sup>3</sup> and ANCOVAs of differences between males and females controlling for age and ICV (means reported in the table are unadjusted).**  
(DOCX)

**S3 Table. Univariate linear regressions of the amygdala, hippocampus, CA2/3, and dentate gyrus with one trait from the FFM and age, gender, and ICV included as covariates. For each variable  $\beta(p)$ .**  
(DOCX)

**S4 Table. Univariate linear regressions of the remaining nuclei of the amygdala and segmentations of the hippocampus with one trait from the FFM and age, gender, and ICV included as covariates. For each variable  $\beta(p)$ .**  
(DOCX)

**S5 Table. Quadratic regressions of the whole amygdala, whole hippocampus, CA2/3, and dentate gyrus with one trait from the FFM and age, gender, and ICV included as**

**covariates.** For each variable  $\beta(p)$  of the quadratic term ( $X^2$ ) is reported. (DOCX)

## Acknowledgments

These data are from the Human Connectome Project, WU-Minn Consortium (Principal Investigators: David Van Essen and Kamil Ugurbil; 1U54MH091657) funded by the 16 NIH Institutes and Centers that support the NIH Blueprint for Neuroscience Research; and by the McDonnell Center for Systems Neuroscience at Washington University in St. Louis. The authors are deeply appreciative to the Human Connectome Project for open access to its data.

Disclaimer: The opinions and assertions expressed herein are those of the authors and do not necessarily reflect the official policy or position of the Uniformed Services University or the Department of Defense.

## Author Contributions

**Conceptualization:** Joshua C. Gray.

**Data curation:** Joshua C. Gray, Max M. Owens.

**Formal analysis:** Joshua C. Gray, Max M. Owens.

**Methodology:** Joshua C. Gray, Max M. Owens, Joshua D. Miller.

**Writing – original draft:** Joshua C. Gray, Max M. Owens.

**Writing – review & editing:** Joshua C. Gray, Max M. Owens, Courtland S. Hyatt, Joshua D. Miller.

## References

1. McCrae R, Costa PTJ. Personality trait structure as a human universal. *Am Psychol.* 1997; 52: 509–516. <https://doi.org/10.1037/0003-066X.52.5.509> PMID: 9145021
2. Bogg T, Roberts BW. Conscientiousness and health-related behaviors: A meta-analysis of the leading behavioral contributors to mortality. *Psychol Bull.* 2004; 130: 887–919. <https://doi.org/10.1037/0033-2909.130.6.887> PMID: 15535742
3. DeNeve KM, Cooper H. The happy personality: A meta-analysis of 137 personality traits and subjective well-being. *Psychol Bull.* 1998; 124: 197–229. <https://doi.org/10.1037/0033-2909.124.2.197> PMID: 9747186
4. Barrick MR, Mount MK. The big five personality dimensions and job performance: A meta-analysis. *Pers Psychol.* 1991; 44: 1–26. <https://doi.org/10.1111/j.1744-6570.1991.tb00688.x>
5. Malouff JM, Thorsteinsson EB, Schutte NS, Bhullar N, Rooke SE. The Five-Factor Model of personality and relationship satisfaction of intimate partners: A meta-analysis. *J Res Pers.* 2010; 44: 124–127. <https://doi.org/10.1016/j.jrp.2009.09.004>
6. Jones S, Miller J, Lynam D. Personality, antisocial behavior, and aggression: A meta-analytic review. *J Crim Justice.* 2011; 39: 329–337. <https://doi.org/10.1016/j.jcrimjus.2011.03.004>
7. Kotov R, Gamez W, Schmidt F, Watson D. Linking “big” personality traits to anxiety, depressive, and substance use disorders: A meta-analysis. *Psychol Bull.* 2010; 136: 768–821. <https://doi.org/10.1037/a0020327> PMID: 20804236
8. Samuel D, Widiger T. A meta-analytic review of the relationships between the five-factor model and DSM-IV-TR personality disorders: A facet level analysis. *Clin Psychol Rev.* 2008; 28: 1326–1342. <https://doi.org/10.1016/j.cpr.2008.07.002> PMID: 18708274
9. Yamagata S, Suzuki A, Ando J, Ono Y, Kijima N, Yoshimura K, et al. Is the genetic structure of human personality universal? A cross-cultural twin study from North America, Europe, and Asia. *J Pers Soc Psychol.* 2006; 90: 987–998. <https://doi.org/10.1037/0022-3514.90.6.987> PMID: 16784347
10. Allik J, McCrae RR. Toward a geography of personality traits: Patterns of profiles across 36 cultures. *J Cross Cult Psychol.* 2004; 35: 13–28.

11. Eysenck SB, Eysenck HJ. Crime and personality: An empirical study of the three-factor theory. *Br J Criminol.* 1970; 10: 225–239.
12. Tellegen A. Structures of mood and personality and their relevance to assessing anxiety, with an emphasis on self-report. In: Tuma AH, Maser JD, editors. *Anxiety and the anxiety disorders.* Hillsdale, NJ, US; 1985. pp. 681–706.
13. Ashton MC, Lee K. Empirical, theoretical, and practical advantages of the HEXACO model of personality structure. *Personal Soc Psychol Rev.* 2007; 11: 150–166. <https://doi.org/10.1177/1088868306294907> PMID: 18453460
14. Costa P, McCrae R. Revised NEO Personality Inventory (NEO-PI-R) and NEO Five-Factor Inventory (NEO-FFI). Odessa, FL: Psychological Assessment Resources; 1992.
15. Ozer DJ, Benet-Martínez V. Personality and the prediction of consequential outcomes. *Annu Rev Psychol.* 2006; 57: 401–421. <https://doi.org/10.1146/annurev.psych.57.102904.190127> PMID: 16318601
16. Lahey BB. Public health significance of neuroticism. *Am Psychol.* 2009; 64: 241–256. <https://doi.org/10.1037/a0015309> PMID: 19449983
17. Sanchez-Roige S, Gray JC, MacKillop J, Chen C-HC-H, Palmer AAA. The genetics of human personality. *Genes, Brain Behav.* 2018; 17: e12439. <https://doi.org/10.1111/gbb.12439> PMID: 29152902
18. Servaas MN, Geerligs L, Renken RJ, Marsman J-BC, Ormel J, Riese H, et al. Connectomics and neuroticism: an altered functional network organization. *Neuropsychopharmacology.* 2015; 40: 296–304. <https://doi.org/10.1038/npp.2014.169> PMID: 25005250
19. Tzschoppe J, Nees F, Banaschewski T, Barker GJ, Büchel C, Conrod PJ, et al. Aversive learning in adolescents: Modulation by amygdala–prefrontal and amygdala–hippocampal connectivity and neuroticism. *Neuropsychopharmacology.* 2014; 39: 875–884. <https://doi.org/10.1038/npp.2013.287> PMID: 24126454
20. Riccelli R, Toschi N, Nigro S, Terracciano A, Passamonti L. Surface-based morphometry reveals the neuroanatomical basis of the five-factor model of personality. *Soc Cogn Affect Neurosci.* 2017; 34: nsw175. <https://doi.org/10.1093/scan/nsw175>
21. Bjørnebekk A, Fjell AM, Walhovd KB, Grydeland H, Torgersen S, Westlye LT. Neuronal correlates of the five factor model (FFM) of human personality: Multimodal imaging in a large healthy sample. *Neuroimage.* 2013; 65: 194–208. <https://doi.org/10.1016/j.neuroimage.2012.10.009> PMID: 23063449
22. Sergerie K, Chochol C, Armony JL. The role of the amygdala in emotional processing: A quantitative meta-analysis of functional neuroimaging studies. *Neurosci Biobehav Rev.* 2008; 32: 811–830. <https://doi.org/10.1016/j.neubiorev.2007.12.002> PMID: 18316124
23. Bickart KC, Dickerson BC, Barrett LF. The amygdala as a hub in brain networks that support social life. *Neuropsychologia.* 2014; 63: 235–48. <https://doi.org/10.1016/j.neuropsychologia.2014.08.013> PMID: 25152530
24. Murty VP, Ritchey M, Adcock RA, LaBar KS. fMRI studies of successful emotional memory encoding: A quantitative meta-analysis. *Neuropsychologia.* 2010; 48: 3459–3469. <https://doi.org/10.1016/j.neuropsychologia.2010.07.030> PMID: 20688087
25. Poppenk J, Evensmoen H. R., Moscovitch M, Nadel L. Long-axis specialization of the human hippocampus. *Trends Cogn Sci.* 2013; 17: 230–240. <https://doi.org/10.1016/j.tics.2013.03.005> PMID: 23597720
26. Felix-Ortiz AC, Tye KM. Amygdala inputs to the ventral hippocampus bidirectionally modulate social behavior. *J Neurosci.* 2014; 34: 586–595. <https://doi.org/10.1523/JNEUROSCI.4257-13.2014> PMID: 24403157
27. Rubin RD, Watson PD, Duff MC, Cohen NJ. The role of the hippocampus in flexible cognition and social behavior. *Front Hum Neurosci.* 2014; 8: 742. <https://doi.org/10.3389/fnhum.2014.00742> PMID: 25324753
28. Omura K, Constable RT, Canli T. Amygdala gray matter concentration is associated with extraversion and neuroticism. *Neuroreport.* 2005; 16: 1905–1908. <https://doi.org/10.1097/01.wnr.0000186596.64458.76> PMID: 16272876
29. Cremers HR, van Tol M-J, Roelofs K, Aleman A, Zitman FG, van Buchem MA, et al. Extraversion is linked to volume of the orbitofrontal cortex and amygdala. *PLoS One.* 2011; 6: e28421. <https://doi.org/10.1371/journal.pone.0028421> PMID: 22174802
30. Lu F, Huo Y, Li M, Chen H, Liu F, Wang Y, et al. Relationship between personality and gray matter volume in healthy young adults: A voxel-based morphometric study. Draganski B, editor. *PLoS One. Public Library of Science;* 2014; 9: e88763. <https://doi.org/10.1371/journal.pone.0088763> PMID: 24551159
31. Koelsch S, Skouras S, Jentschke S, Friederich H, Stippich C. Neural correlates of emotional personality: A structural and functional magnetic resonance imaging study. *PLoS One.* 2013; 8: e77196. <https://doi.org/10.1371/journal.pone.0077196> PMID: 24312166

32. Wright CI, Williams D, Feczko E, Barrett LF, Dickerson BC, Schwartz CE, et al. Neuroanatomical correlates of extraversion and neuroticism. *Cereb Cortex*. 2006; 16: 1809–1819. <https://doi.org/10.1093/cercor/bhj118> PMID: 16421327
33. Wright CI, Feczko E, Dickerson B, Williams D. Neuroanatomical correlates of personality in the elderly. *Neuroimage*. 2007; 35: 263–72. <https://doi.org/10.1016/j.neuroimage.2006.11.039> PMID: 17229578
34. Jackson J, Balota DA, Head D. Exploring the relationship between personality and regional brain volume in healthy aging. *Neurobiol Aging*. 2011; 32: 2162–2171. <https://doi.org/10.1016/j.neurobiolaging.2009.12.009> PMID: 20036035
35. Mincic AM. Neuroanatomical correlates of negative emotionality-related traits: A systematic review and meta-analysis. *Neuropsychologia*. 2015; 77: 97–118. <https://doi.org/10.1016/j.neuropsychologia.2015.08.007> PMID: 26265397
36. Holmes AJ, Lee PH, Hollinshead MO, Bakst L, Roffman JL, Smoller JW, et al. Individual differences in amygdala-medial prefrontal anatomy link negative affect, impaired social functioning, and polygenic depression risk. *J Neurosci*. 2012; 32: 18087–18100. <https://doi.org/10.1523/JNEUROSCI.2531-12.2012> PMID: 23238724
37. Strange BA, Witter MP, Lein ES, Moser EI. Functional organization of the hippocampal longitudinal axis. *Nat Rev Neurosci*. 2014; 15: 655–669. <https://doi.org/10.1038/nrn3785> PMID: 25234264
38. van Erp TGM, Hibar DP, Rasmussen JM, Glahn DC, Pearlson GD, Andreassen OA, et al. Subcortical brain volume abnormalities in 2028 individuals with schizophrenia and 2540 healthy controls via the ENIGMA consortium. *Mol Psychiatry*. 2016; 21: 547–553. <https://doi.org/10.1038/mp.2015.63> PMID: 26033243
39. Nelson MD, Tumpap AM. Posttraumatic stress disorder symptom severity is associated with left hippocampal volume reduction: a meta-analytic study. *CNS Spectr*. 2017; 22: 363–372. <https://doi.org/10.1017/S1092852916000833> PMID: 27989265
40. Wise T, Radua J, Via E, Cardoner N, Abe O, Adams TM, et al. Common and distinct patterns of grey-matter volume alteration in major depression and bipolar disorder: evidence from voxel-based meta-analysis. *Mol Psychiatry*. 2017; 22: 1455–1463. <https://doi.org/10.1038/mp.2016.72> PMID: 27217146
41. Bora E, Fornito A, Pantelis C, Yücel M. Gray matter abnormalities in major depressive disorder: A meta-analysis of voxel based morphometry studies. *J Affect Disord*. 2012; 138: 9–18. <https://doi.org/10.1016/j.jad.2011.03.049> PMID: 21511342
42. Goodkind M, Eickhoff SB, Oathes DJ, Jiang Y, Chang A, Jones-Hagata LB, et al. Identification of a common neurobiological substrate for mental illness. *JAMA Psychiatry*. 2015; 72: 305–315. <https://doi.org/10.1001/jamapsychiatry.2014.2206> PMID: 25651064
43. Wigmore EM, Clarke TK, Howard DM, Adams MJ, Hall LS, Zeng Y, et al. Do regional brain volumes and major depressive disorder share genetic architecture? A study of Generation Scotland (n = 19 762), UK Biobank (n = 24 048) and the English Longitudinal Study of Ageing (n = 5766). *Transl Psychiatry*. 2017; 7: e1205. <https://doi.org/10.1038/tp.2017.148> PMID: 28809859
44. Fischl B. FreeSurfer. *Neuroimage*. 2012; 62: 774–781. <https://doi.org/10.1016/j.neuroimage.2012.01.021> PMID: 22248573
45. Iglesias JE, Augustinack JC, Nguyen K, Player CM, Player A, Wright M, et al. A computational atlas of the hippocampal formation using ex vivo, ultra-high resolution MRI: Application to adaptive segmentation of in vivo MRI. *Neuroimage*. 2015; 115: 117–37. <https://doi.org/10.1016/j.neuroimage.2015.04.042> PMID: 25936807
46. Saygin ZM, Kliemann D, Iglesias JE, van der Kouwe AJW, Boyd E, Reuter M, et al. High-resolution magnetic resonance imaging reveals nuclei of the human amygdala: manual segmentation to automatic atlas. *Neuroimage*. 2017; 155: 370–382. <https://doi.org/10.1016/j.neuroimage.2017.04.046> PMID: 28479476
47. Brody GH, Gray JC, Yu T, Barton AW, Beach SRH, Galván A, et al. Protective prevention effects on the association of poverty with brain development. *JAMA Pediatr*. 2017; 171: 46–52. <https://doi.org/10.1001/jamapediatrics.2016.2988> PMID: 27893880
48. Teicher MH, Anderson CM, Polcari A. Childhood maltreatment is associated with reduced volume in the hippocampal subfields CA3, dentate gyrus, and subiculum. *Proc Natl Acad Sci U S A*. 2012; 109: E563–72. <https://doi.org/10.1073/pnas.1115396109> PMID: 22331913
49. Pagliaccio D, Luby JL, Bogdan R, Agrawal A, Gaffrey MS, Belden AC, et al. Stress-system genes and life stress predict cortisol levels and amygdala and hippocampal volumes in children. *Neuropsychopharmacology*. 2014; 39: 1245–1253. <https://doi.org/10.1038/npp.2013.327> PMID: 24304824
50. Shiner RL, Allen TA, Masten AS. Adversity in adolescence predicts personality trait change from childhood to adulthood. *J Res Pers*. 2017; 67: 171–182. <https://doi.org/10.1016/j.jrp.2016.10.002>

51. Cao B, Passos IC, Mwangi B, Amaral-Silva H, Tannous J, Wu M-J, et al. Hippocampal subfield volumes in mood disorders. *Mol Psychiatry*. 2017; 22: 1352–1358. <https://doi.org/10.1038/mp.2016.262> PMID: [28115740](https://pubmed.ncbi.nlm.nih.gov/28115740/)
52. Treadway MT, Waskom ML, Dillon DG, Holmes AJ, Park MTM, Chakravarty MM, et al. Illness progression, recent stress, and morphometry of hippocampal subfields and medial prefrontal cortex in major depression. *Biol Psychiatry*. 2015; 77: 285–294. <https://doi.org/10.1016/j.biopsych.2014.06.018> PMID: [25109665](https://pubmed.ncbi.nlm.nih.gov/25109665/)
53. Gilpin NW, Herman MA, Roberto M. The central amygdala as an integrative hub for anxiety and alcohol use disorders. *Biol Psychiatry*. 2015; 77: 859–869. <https://doi.org/10.1016/j.biopsych.2014.09.008> PMID: [25433901](https://pubmed.ncbi.nlm.nih.gov/25433901/)
54. Van Essen DC, Smith SM, Barch DM, Behrens TE, Yacoub E, Ugurbil K, et al. The WU-Minn human connectome project: an overview. *Neuroimage*. 2013; 80: 62–79. <https://doi.org/10.1016/j.neuroimage.2013.05.041> PMID: [23684880](https://pubmed.ncbi.nlm.nih.gov/23684880/)
55. Van Essen DC, Ugurbil K, Auerbach E, Barch D, Behrens T, Bucholz R, et al. The Human Connectome Project: A data acquisition perspective. *Neuroimage*. 2012; 62: 2222–2231. <https://doi.org/10.1016/j.neuroimage.2012.02.018> PMID: [22366334](https://pubmed.ncbi.nlm.nih.gov/22366334/)
56. Rorden C. Dcm2nii to NIFTI converter. 2007.
57. Dale AM, Fischl B, Sereno MI. Cortical surface-based analysis. I. Segmentation and surface reconstruction. *Neuroimage*. 1999; 9: 179–194. <https://doi.org/10.1006/nimg.1998.0395> PMID: [9931268](https://pubmed.ncbi.nlm.nih.gov/9931268/)
58. Fischl B, Sereno MI, Dale AM. Cortical surface-based analysis: II: Inflation, flattening, and a surface-based coordinate system. *Neuroimage*. 1999; 9: 195–207. <https://doi.org/10.1006/nimg.1998.0396> PMID: [9931269](https://pubmed.ncbi.nlm.nih.gov/9931269/)
59. Fischl B, Van Der Kouwe A, Destrieux C, Halgren E, Ségonne F, Salat DH, et al. Automatically Parcelating the Human Cerebral Cortex. *Cereb Cortex*. 2004; 14: 11–22. <https://doi.org/10.1093/cercor/bhg087> PMID: [14654453](https://pubmed.ncbi.nlm.nih.gov/14654453/)
60. Whelan CD, Hibar DP, van Velzen LS, Zannas AS, Carrillo-Roa T, McMahon K, et al. Heritability and reliability of automatically segmented human hippocampal formation subregions. *Neuroimage*. 2016; 128: 125–137. <https://doi.org/10.1016/j.neuroimage.2015.12.039> PMID: [26747746](https://pubmed.ncbi.nlm.nih.gov/26747746/)
61. Benjamini Y, Hochberg Y. Controlling the false discovery rate: A practical and powerful approach to multiple testing. *J R Stat Soc Ser B*. 1995; 57: 289–300. <https://doi.org/10.2307/2346101>
62. Lynam DR, Hoyle RH, Newman JP. The perils of partialling: Cautionary tales from aggression and psychopathy. *Assessment*. 2006; 13: 328–341. <https://doi.org/10.1177/1073191106290562> PMID: [16880283](https://pubmed.ncbi.nlm.nih.gov/16880283/)
63. Sleep CE, Lynam DR, Hyatt CS, Miller JD. Perils of partialing redux: The case of the Dark Triad. *J Abnorm Psychol*. 2017; 126: 939–950. <https://doi.org/10.1037/abn0000278> PMID: [29106279](https://pubmed.ncbi.nlm.nih.gov/29106279/)
64. Nostro AD, Müller VI, Reid AT, Eickhoff SB. Correlations between personality and brain structure: A crucial role of gender. *Cereb Cortex*. 2016; 27: 3698–3712. <https://doi.org/10.1093/cercor/bhw191> PMID: [27390020](https://pubmed.ncbi.nlm.nih.gov/27390020/)
65. van der Linden D, te Nijenhuis J, Baker AB. The general factor of personality: A meta-analysis of Big Five intercorrelations and a criterion-related validity study. *J Res Pers*. 2010; 44: 315–327.
66. Schmitt DP, Realo A, Voracek M, Allik J. Why can't a man be more like a woman? Sex differences in Big Five personality traits across 55 cultures. *J Pers Soc Psychol*. 2008; 94: 168–182. <https://doi.org/10.1037/0022-3514.94.1.168> PMID: [18179326](https://pubmed.ncbi.nlm.nih.gov/18179326/)
67. Ritchie SJ, Cox SR, Shen X, Lombardo MV, Reus LM, Alloza C, et al. Sex differences in the adult human brain: evidence from 5216 UK Biobank participants. *Cereb Cortex*. 2018; 28: 2959–2979. <https://doi.org/10.1093/cercor/bhy109> PMID: [29771288](https://pubmed.ncbi.nlm.nih.gov/29771288/)
68. Tan A, Ma W, Vira A, Marwha D, Elliot L. The human hippocampus is not sexually-dimorphic: meta-analysis of structural MRI volume. *Neuroimage*. 2016; 124: 350–366. <https://doi.org/10.1016/j.neuroimage.2015.08.050> PMID: [26334947](https://pubmed.ncbi.nlm.nih.gov/26334947/)
69. Labonté B, Engmann O., Purushothaman I., Menard C, Wang J, Tan C, Scarpa JR, Moy G, et al. Sex-specific transcriptional signatures in human depression. *Nat Med*. 2017; 23: 1102–1111. <https://doi.org/10.1038/nm.4386> PMID: [28825715](https://pubmed.ncbi.nlm.nih.gov/28825715/)
70. Soto CJ, John OP, Gosling SD, Potter J. Age differences in personality traits from 10 to 65: Big Five domains and facets in a large cross-sectional sample. *J Pers Soc Psychol*. 2011; 100: 330–348. <https://doi.org/10.1037/a0021717> PMID: [21171787](https://pubmed.ncbi.nlm.nih.gov/21171787/)
71. De Witte NAJ, Mueller SC. White matter integrity in brain networks relevant to anxiety and depression: evidence from the human connectome project dataset. *Brain Imaging Behav*. 2017; 11: 1604–1615. <https://doi.org/10.1007/s11682-016-9642-2> PMID: [27744495](https://pubmed.ncbi.nlm.nih.gov/27744495/)

72. Kurth F, Cherbuin N, Luders E. The impact of aging on subregions of the hippocampal complex in healthy adults. *Neuroimage*. 2017; 163: 296–300. <https://doi.org/10.1016/j.neuroimage.2017.09.016> PMID: [28917699](https://pubmed.ncbi.nlm.nih.gov/28917699/)
73. Cremers HR, Wager TD, Yarkoni T. The relation between statistical power and inference in fMRI. Gilbert S, editor. *PLoS One*. 2017; 12: e0184923. <https://doi.org/10.1371/journal.pone.0184923> PMID: [29155843](https://pubmed.ncbi.nlm.nih.gov/29155843/)
74. Button KS, Ioannidis JPA, Mokrysz C, Nosek BA, Flint J, Robinson ESJ, et al. Power failure: Why small sample size undermines the reliability of neuroscience. *Nat Rev Neurosci*. 2013; 14: 365–376. <https://doi.org/10.1038/nrn3475> PMID: [23571845](https://pubmed.ncbi.nlm.nih.gov/23571845/)
75. Privado J, Román FJ, Saénz-Urturi C, Burgaleta M, Colom R. Gray and white matter correlates of the Big Five personality traits. *Neuroscience*. 2017; 349: 174–184. <https://doi.org/10.1016/j.neuroscience.2017.02.039> PMID: [28259799](https://pubmed.ncbi.nlm.nih.gov/28259799/)
76. Pang Y, Cui Q, Wang Y, Chen Y, Wang X, Han S, et al. Extraversion and neuroticism related to the resting-state effective connectivity of amygdala. *Sci Rep*. 2016; 6: 35484. <https://doi.org/10.1038/srep35484> PMID: [27765947](https://pubmed.ncbi.nlm.nih.gov/27765947/)
77. Klamer S, Schwarz L, Krüger O, Koch K, Erb M, Scheffler K, et al. Association between neuroticism and emotional face processing. *Sci Rep*. 2017; 7: 17669. <https://doi.org/10.1038/s41598-017-17706-2> PMID: [29247161](https://pubmed.ncbi.nlm.nih.gov/29247161/)
